# Supplementary material
Source: publisher figshare collection journal article supplement (https://karger.figshare.com/ndownloader/files/24089621)
Supplement: Supplementary file 1 [file 24089621]

## Sheet: SPERM_GOs_relatg._to_membranes
Supplementary Table S4. SPERM sample: gene ontologies (GOs) relating to membranes, as gathered from UniProt
Gray background cells refer to 20 SPERM proteins with high and 20 SPERM proteins with low hydropathy indices. The respective sections correspond to Tables 2 and 3. The information referring to single- and multi-pass membrane proteins is also contained in the sheet Membrane_proteins of S3 Table.
	Hydropathy index	ENSEMBL ID	UniProt annotations referring to membranes	GO - Cellular component annotation referring to membranes
	0.512	ENSP00000317000	multi-pass membrane protein, lysosomal membrane	lysosomal membrane, integral component of membrane
	0.313	ENSP00000266682	multi-pass membrane protein	integral component of membrane, plasma membrane
	0.165	ENSP00000351717	multi-pass membrane protein, mitochondrion inner membrane	mitochondrial envelope, mitochondrial inner membrane, integral component of membrane, membrane
	0.151	ENSP00000394405		endoplasmic reticulum, extracellular exosome, cytoplasm
	0.057	ENSP00000309430	multi-pass membrane protein, endoplasmic reticulum membrane	endoplasmic reticulum membrane, membrane
	-0.054	ENSP00000367721	nuclear core complex	nuclear envelope, nuclear pore, nuclear pore outer ring
	-0.055	ENSP00000364133	cell membrane, single-pass type I membrane protein, membrane raft	integral component of plasma membrane, plasma membrane, intracellular membrane-bounded organelle, membrane, membrane raft
	-0.084	ENSP00000209873	nuclear pore complex	nuclear envelope, nuclear membrane, nuclear pore, membrane
	-0.098	ENSP00000258091	cytoplasm
	-0.114	ENSP00000321584		peroxisomal membrane, membrane
	-0.123	ENSP00000402608		mitochondrial inner membrane
	-0.134	ENSP00000261615	apical cell membrane, microvillus membrane	apical plasma membrane, microvillus membrane, plasma membrane, anchored component of cell membrane
	-0.138	ENSP00000238561	secreted
	-0.138	ENSP00000317159	mitochondrion inner membrane, single-pass membrane protein, inner membrane side	mitochondrial inner membrane, mitochondrial respiratory chain complex III, integral component of membrane, membrane
	-0.165	ENSP00000250244	clathrin-coated membrane, peripheral membrane protein, cytoplasmic side	Golgi membrane, trans-Golgi network membrane, lysosomal membrane, clathrin-coated vesicle membrane, cytoplasmic vesicle membrane
	-0.168	ENSP00000241041	peroxisome membrane, multi-pass membrane protein	endoplasmic reticulum membrane, integral component of peroxisomal membrane, peroxisomal membrane, membrane
	-0.169	ENSP00000249269		mitochondrial inner membrane
	-0.201	ENSP00000332118	cell membrane, single-pass type I membrane protein	integral component of plasma membrane, plasma membrane
	-0.204	ENSP00000370839	single-pass type II membrane protein	integral component of plasma membrane
	-0.224	ENSP00000220584	endoplasmic reticulum membrane, multi-pass membrane protein	endoplasmic reticulum membrane, integral component of membrane
	-0.228	ENSP00000226105	cell membrane, peripheral membrane protein	plasma membrane
	-0.23	ENSP00000473172	membrane	membrane
	-0.25	ENSP00000435466	cell membrane, single-pass type I membrane protein	plasma membrane, integral component of membrane
	-0.255	ENSP00000274376		plasma membrane
	-0.263	ENSP00000200135	endoplasmic reticulum membrane, peripheral membrane protein
	-0.268	ENSP00000398688
	-0.268	ENSP00000287295	mitochondion intermembrane space, mictochondrion inner membrane	mitochondrial inner membrane, mitochondrial inner membrane space
	-0.293	ENSP00000290216
	-0.301	ENSP00000359925	membrane, peripheral membrane protein	membrane
	-0.327	ENSP00000348471	ruffle membrane
	-0.329	ENSP00000263897	endoplasmic reticulum membrane, single-pass type IV membrane protein	endoplasmic reticulum membrane, integral component of membrane
	-0.334	ENSP00000406012
	-0.343	ENSP00000393183
	-0.343	ENSP00000263056
	-0.345	ENSP00000222120	cell membrane, lipid-anchor, cytoplasmic side	plasma membrane
	-0.357	ENSP00000304891
	-0.359	ENSP00000342262	nuclear pore complex	nuclear envelope, nuclear outer ring
	-0.366	ENSP00000402584	cell membrane, GPI-anchor	anchored component of plasma membrane, plasma membrane
	-0.409	ENSP00000349244
	-0.429	ENSP00000347792	cell membrane, membrane raft	extrinsic component of mitochondrial outer membrane, ruffle membrane, membrane raft
	-0.431	ENSP00000344668	cell membrane, peripheral membrane protein	plasma membrane
	-0.434	ENSP00000265983	secreted	extracellular region etc.
	-0.434	ENSP00000342793	late endosome membrane, Golgi apparatus membrane, endoplasmic reticulum membrane	endoplasmic reticulum membrane, late endosome membrane, Golgi membrane, lysosomal membrane, apical plasma membrane, plasma membrane, membrane, specific granule membrane, tertiary granule membrane
	-0.457	ENSP00000350094
	-0.459	ENSP00000262507		mitochondrion inner membrane
	-0.463	ENSP00000352408
	-0.464	ENSP00000384273
	-0.471	ENSP00000231061	basement membrane	basement membrane, platelet granule membrane
	-0.475	ENSP00000360286		nuclear envelope, nuclear pore
	-0.479	ENSP00000160373
	-0.481	ENSP00000377390		Golgi membrane, plasma membrane
	-0.482	ENSP00000357922	secreted	extracellular region
	-0.488	ENSP00000309132	endomembrane system	endomembrane system, membrane
	-0.489	ENSP00000253055
	-0.515	ENSP00000288937		mitochondrial membrane
	-0.52	ENSP00000219313	membrane
	-0.527	ENSP00000381425
	-0.548	ENSP00000355237	cell membrane, peripheral membrane protein, cytoplasmic side	plasma membrane
	-0.57	ENSP00000362590
	-0.572	ENSP00000415430	membrane
	-0.588	ENSP00000340093	early endosome membrane, Golgi apparatus membrane, peripheral membrane protein, nucleus envelope	early endosome membrane, photoreceptor outer segment membrane, membrane-bounded organelle
	-0.606	ENSP00000286800
	-0.614	ENSP00000260187		membrane
	-0.63	ENSP00000303058
	-0.675	ENSP00000304895	plasma membrane	intracellular membrane-bounded organelle
	-0.696	ENSP00000420854
	-0.708	ENSP00000359799	cell membrane	plasma membrane
	-0.752	ENSP00000358045	extracellular region or secreted	extracellular matrix etc.
	-0.784	ENSP00000252137
	-0.817	ENSP00000333666	cell membrane, peripheral membrane protein, cytoplasmic side	plasma membrane
	-0.824	ENSP00000417653	peripheral membrane protein, cell membrane, cytoplasmic side, clathrin-coated vesicle membrane
	-0.833	ENSP00000333024		plasma membrane
	-0.913	ENSP00000264708	secreted
	-0.923	ENSP00000438262	cell membrane, peripheral membrane protein	plasma membrane
	-0.969	ENSP00000347161
	-1.115	ENSP00000342121		nuclear membrane, intracellular membrane-bounded organelle
	-1.233	ENSP00000345917
